# Supplementary material for: Correlating Mass Spectrometry Imaging and Liquid Chromatography-Tandem Mass Spectrometry for Tissue-Based Pharmacokinetic Studies
Source: MDPI journal article supplement (doi:10.3390/metabo12030261), 2022-03-18
Supplement: s1 [file s1]

Supplementary information: “Correlating mass spectrometry imaging and liquid chromatography-tandem mass spectrometry for tissue-based pharmacokinetic studies”

Andreas Dannhorn<sup>1,2</sup>, Emine Kazanc<sup>1</sup>, Gregory Hamm<sup>2</sup>, John Swales<sup>2</sup>, Nicole Strittmatter<sup>2</sup>, Gareth Maglennon<sup>2</sup>, Richard JA Goodwin<sup>2</sup>, Zoltan Takats<sup>1,5,6\*</sup>

1 Department of Metabolism, Digestion and Reproduction, Imperial College London, London, UK

2 Imaging & Data Analytics, Clinical Pharmacology and Safety Sciences, R&D, AstraZeneca, Cambridge, UK

3 Oncology Safety, Clinical Pharmacology and Safety Sciences, R&D, AstraZeneca, Cambridge, UK

4 Institute of Infection, Immunity and Inflammation, College of Medical, Veterinary and Life Sciences, University of Glasgow, Glasgow, UK

5 Laboratoire PRISM Inserm U1192 - University of Lille, Villeneuve d'Ascq, France

6 The Rosalind Franklin Institute, Harwell, UK

**Supplementary Figure S1:**

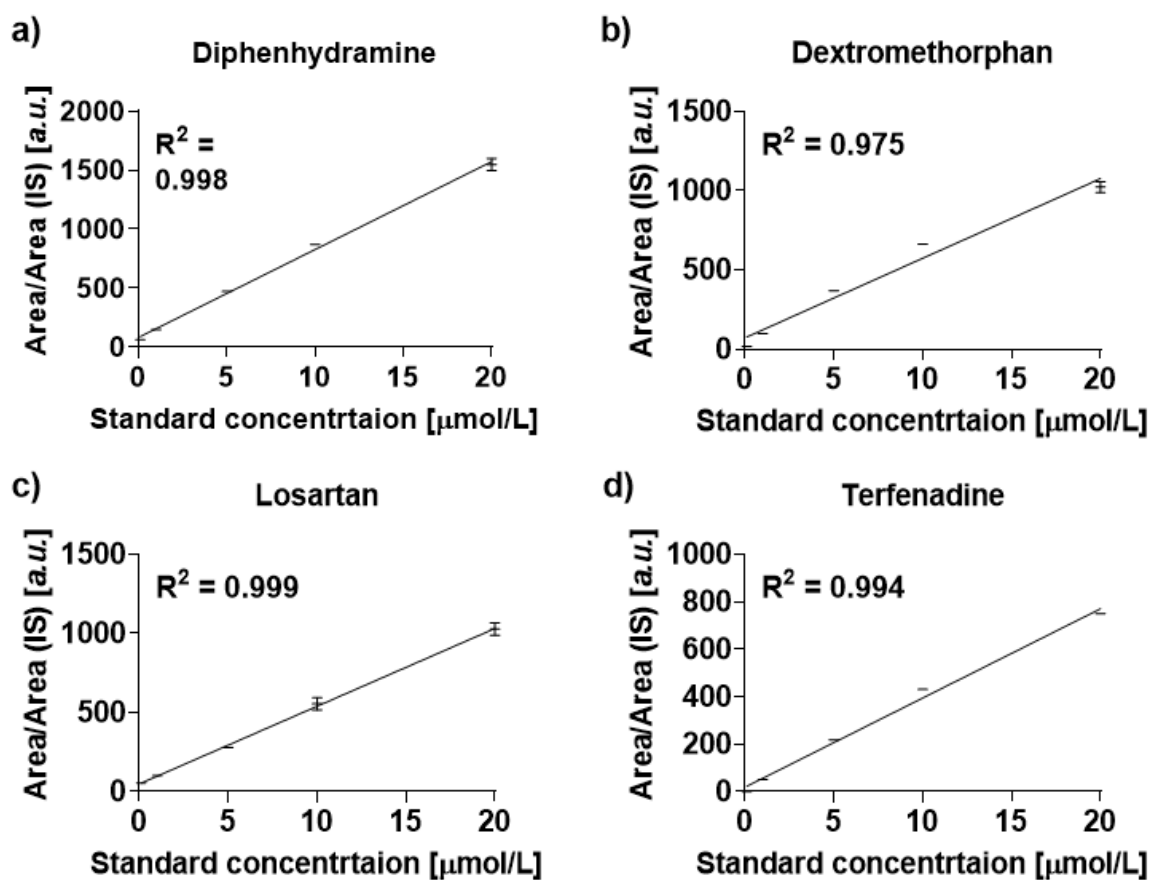

Figure S1. Linear regression lines for the internal standard (IS) normalized peak areas over the standard concentration: for (a) diphenhydramine, (b) dextromethorphan, (c) losartan and (d) terfenadine. Data is presented as mean  $\pm$  SD,  $n = 4$  replicates per measurement

**Supplementary Figure S2:**

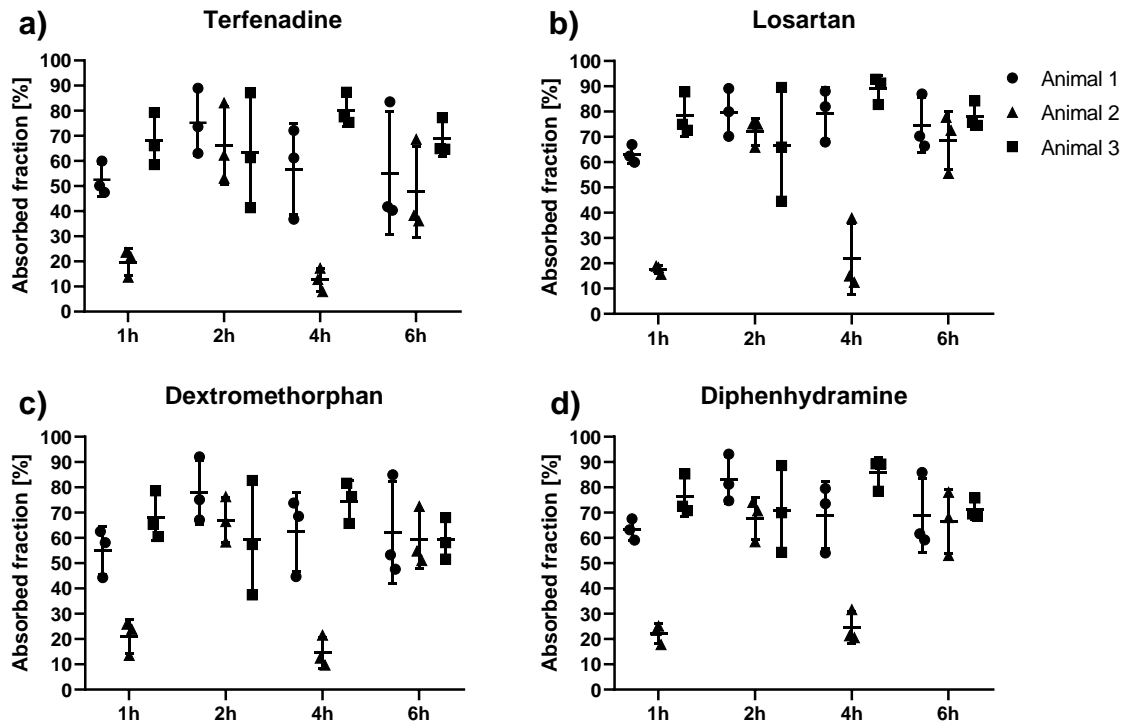

Figure S2. Individual values for the estimated absorbed drug fractions: for (a) terfenadine, (b) Losartan, (c) Dextromethorphan and (d) diphenhydramine. As the sample collection was terminal, animals 1-3 represent different animals for each timepoint. The assignment of the symbols is identical with the assignment in Figure 2.
